# Supplementary material
Source: HighWire-hosted journal article supplement (https://www.jrheum.org/highwire/filestream/38048/field_highwire_adjunct_files/0/190376DataSuppl.pdf)
Supplement: 190376DataSuppl.pdf [file 190376DataSuppl.pdf]

Table S1: Additional BAM stats– Table showing average read depth, number of total aligned reads and aligned reads specifically in chromosome 6 in healthy controls (HC) and RA patients (RA).

| Sample ID | Average Depth | Total aligned reads | %QC Passed | Aligned reads in Chr 6 |
|-----------|---------------|---------------------|------------|------------------------|
| HC_01     | 37            | 9953158             | 100        | 2323302                |
| HC_02     | 34            | 9962256             | 100        | 2019076                |
| HC_03     | 38            | 10150890            | 100        | 3119094                |
| HC_04     | 37            | 10341636            | 100        | 2525062                |
| HC_05     | 31            | 9148738             | 100        | 2669338                |
| HC_06     | 137           | 16167290            | 100        | 8774004                |
| HC_07     | 155           | 15068280            | 100        | 8326580                |
| HC_08     | 154           | 12234242            | 100        | 6860274                |
| HC_09     | 131           | 15617204            | 100        | 8680762                |
| HC_10     | 139           | 15794282            | 100        | 8788548                |
| HC_11     | 94            | 13113760            | 100        | 7277960                |
| HC_12     | 151           | 14947558            | 100        | 8340998                |
| HC_13     | 145           | 14230566            | 100        | 8454338                |
| HC_14     | 136           | 8652700             | 100        | 4502246                |
| HC_15     | 126           | 15876522            | 100        | 8792690                |
| HC_16     | 161           | 13751662            | 100        | 7595462                |
| HC_17     | 141           | 13178864            | 100        | 7459960                |
| RA_01     | 37            | 9282020             | 100        | 2293042                |
| RA_02     | 38            | 8260274             | 100        | 2579064                |
| RA_03     | 37            | 10258894            | 100        | 2354656                |
| RA_04     | 35            | 8872216             | 100        | 2266988                |
| RA_05     | 32            | 7431306             | 100        | 2076940                |
| RA_06     | 156           | 15928574            | 100        | 8821214                |
| RA_07     | 149           | 14767336            | 100        | 8083688                |
| RA_08     | 155           | 17077478            | 100        | 9406890                |
| RA_09     | 163           | 13109468            | 100        | 7301638                |
| RA_10     | 134           | 17634868            | 100        | 8830918                |
| RA_11     | 151           | 16110900            | 100        | 8387294                |
| RA_12     | 156           | 18626472            | 100        | 9562310                |
| RA_13     | 156           | 14929390            | 100        | 7540138                |
| RA_14     | 146           | 17861892            | 100        | 9874670                |
| RA_15     | 166           | 14492544            | 100        | 7830202                |
| RA_16     | 155           | 16356608            | 100        | 8963196                |
| RA_17     | 162           | 17681976            | 100        | 9607416                |

Table S2 – Table showing the age, DAS28 scores and medications administered to ACPA+ RA patients included in the TBSeq cohort

| <b>ID</b> | <b>Age</b> | <b>DAS28</b> | <b>Medication</b>                                              |
|-----------|------------|--------------|----------------------------------------------------------------|
| RA1       | 19.5       | 5.66         | Not available                                                  |
| RA2       | 48.5       | 3.44         | Not available                                                  |
| RA3       | 27.1       | 5.33         | Not available                                                  |
| RA4       | 51.0       | 6.59         | MTX; SSZ                                                       |
| RA5       | 46.8       | 3.55         | Not available                                                  |
| RA6       | 55.4       | 4.00         | HCQ                                                            |
| RA7       | 52.9       | 4.44         | T3; Leflunomide                                                |
| RA8       | 70.1       | 3.28         | HCQ; MTX; SSZ                                                  |
| RA9       | 48.2       | 3.14         | HCQ; MTX                                                       |
| RA10      | 35.8       | 2.90         | Humira, percocet                                               |
| RA11      | 53.2       | 3.09         | MTX (Hx: HCQ, SSZ)                                             |
| RA12      | 56.2       | 4.85         | MTX; Hx: gold; DepoMedrol IM                                   |
| RA13      | 58.3       | 3.10         | MTX and HCQ x 8 weeks                                          |
| RA14      | 41.1       | 2.62         | MTX; Prednisone, Humira; Percocet; Tylenol #3; Folic Acid      |
| RA15      | 40.1       | 4.64         | MTX; Humira;                                                   |
| RA16      | 54.5       | 2.20         | leflunomide; Hydroxychloroquine; Past hx: MTX, depo injections |
| RA17      | 27.4       | 5.42         | MTX sc/weekly; HCQ, folic acid, tylenol                        |

Table S3: Primers for mRNA targets identified through targeted bisulfite sequencing

| Gene ID | Primer Sequence               | NCBI Accession ID | Amplicon Size (kb) |
|---------|-------------------------------|-------------------|--------------------|
| 18S     | F 5'-AAAGGAATTGACGGAAGGGCACCA | NR_003286.1       | 174                |
|         | R 5'-ACCAGACAAATCGCTCCACCAACT |                   |                    |
| C6ORF10 | F 5'-AATTCACAGCCCCTATTCCC     | NM_006781.4       | 119                |
|         | R 5'-TTATGGGTGCCATGGGTG       |                   |                    |
| HLA-DOB | F 5'-GTGGCTCTGCTAGTGAATCTG    | NM_002120.3       | 114                |
|         | R 5'-TGTCCCGTTGGTGAAGTAAC     |                   |                    |
| TNXB    | F 5'-TGTGTCTGCAAAGATGGGTATG   | NM_019105.6       | 143                |
|         | R 5'-ATTTTCATAGGCATCCACGGG    |                   |                    |
| HCG18   | F 5'-AAGGGATTTGGAATTGCACTTG   | NR_024052.2       | 147                |
|         | R 5'-TGGCTTCAGTCCTGTTTCATC    |                   |                    |

Primers were designed using Primer Quest (IDT Technologies) and verified by Primer Blast (NCBI). 18S Ribosomal RNA; F=Forward; R=Reverse

Table S4: Table showing list of all the DMLs identified in RA patients by TBSeq. Average  $\beta$ -value represents the difference in methylation levels at that CpG location between RA patients and ACPA-/FDR. *P*-values were calculated by Mann-Whitney U test. NA= Not applicable as gene annotation was not available at that position.

| <b>CpG Position</b> | <b>Gene</b>      | <b>Ave <math>\beta</math>-Value (RA - Control)</b> | <b><i>P</i>-Value</b> |
|---------------------|------------------|----------------------------------------------------|-----------------------|
| 32986780            | NA               | -1.22                                              | 0.00041               |
| 32777215            | NA               | -2.28                                              | 0.00152               |
| 32764718            | NA               | -2.33                                              | 0.00156               |
| 32780469            | <i>HLA-DOB</i>   | -2.75                                              | 0.00249               |
| 32774787            | NA               | -2.21                                              | 0.00273               |
| 31154433            | NA               | -0.50                                              | 0.00274               |
| 33043508            | <i>HLA-DPA1</i>  | -0.85                                              | 0.00436               |
| 32761774            | NA               | -2.27                                              | 0.00452               |
| 32780200            | <i>HLA-DOB</i>   | -2.54                                              | 0.00639               |
| 32765613            | NA               | -0.54                                              | 0.00676               |
| 32740732            | NA               | -0.90                                              | 0.00685               |
| 32836118            | NA               | 0.64                                               | 0.00825               |
| 31010741            | NA               | -0.59                                              | 0.01272               |
| 32899295            | NA               | -1.99                                              | 0.01381               |
| 31508958            | <i>DDX39B</i>    | -0.91                                              | 0.01423               |
| 30713294            | <i>IER3</i>      | -0.31                                              | 0.01635               |
| 30951556            | <i>MUC21</i>     | 0.15                                               | 0.01827               |
| 32341351            | <i>C6orf10</i>   | -1.56                                              | 0.01961               |
| 32765450            | NA               | -0.66                                              | 0.02126               |
| 30232512            | <i>HLA-L</i>     | 1.57                                               | 0.02136               |
| 31584370            | <i>AIF1</i>      | -0.86                                              | 0.02214               |
| 29557409            | <i>OR2H2</i>     | -0.61                                              | 0.02324               |
| 32305977            | <i>C6orf10</i>   | -1.69                                              | 0.02364               |
| 31320339            | NA               | -0.30                                              | 0.02504               |
| 30325617            | NA               | 0.67                                               | 0.0263                |
| 29717695            | <i>HLA-F-AS1</i> | -0.82                                              | 0.02648               |
| 32760712            | NA               | -1.83                                              | 0.02722               |
| 29558189            | NA               | -1.25                                              | 0.02725               |
| 30112729            | <i>TRIM40</i>    | 0.23                                               | 0.02782               |
| 32765670            | NA               | -1.41                                              | 0.0291                |
| 30099090            | NA               | 0.67                                               | 0.02926               |
| 31350089            | NA               | 1.57                                               | 0.02928               |
| 32303846            | <i>C6orf10</i>   | -1.51                                              | 0.02935               |
| 30104439            | <i>TRIM40</i>    | 0.66                                               | 0.03022               |

|          |                |       |         |
|----------|----------------|-------|---------|
| 30584269 | <i>PPP1R10</i> | -0.60 | 0.03034 |
| 33021414 | NA             | -1.34 | 0.03044 |
| 32767672 | NA             | -1.35 | 0.03059 |
| 32754212 | NA             | -0.69 | 0.03067 |
| 32338985 | <i>C6orf10</i> | -1.21 | 0.03096 |
| 32777539 | NA             | -1.44 | 0.03143 |
| 32762790 | NA             | -1.72 | 0.03283 |
| 33022485 | NA             | -1.44 | 0.03287 |
| 32070067 | <i>TNXB</i>    | -1.95 | 0.03455 |
| 30224304 | NA             | 1.83  | 0.0348  |
| 32816956 | <i>TAP1</i>    | -1.75 | 0.0362  |
| 32780154 | <i>HLA-DOB</i> | -1.45 | 0.03625 |
| 30264306 | <i>HCG18</i>   | 1.87  | 0.03699 |
| 31946612 | <i>STK19</i>   | -1.77 | 0.03811 |
| 29644501 | <i>ZFP57</i>   | 1.62  | 0.03879 |
| 31369118 | <i>MICA</i>    | 0.42  | 0.03929 |
| 30286728 | <i>HCG18</i>   | 1.67  | 0.0397  |
| 32941824 | <i>BRD2</i>    | -0.52 | 0.04048 |
| 32953082 | NA             | 0.86  | 0.04146 |
| 33021371 | NA             | -1.43 | 0.04153 |
| 30325646 | NA             | -0.64 | 0.04227 |
| 30809095 | NA             | -0.54 | 0.04236 |
| 32767431 | NA             | -1.33 | 0.04248 |
| 29821690 | NA             | -0.26 | 0.04277 |
| 32033005 | <i>TNXB</i>    | -1.62 | 0.04286 |
| 30316738 | NA             | 1.76  | 0.04297 |
| 32760443 | NA             | -1.78 | 0.04298 |
| 32935520 | <i>BRD2</i>    | -0.57 | 0.043   |
| 33023161 | NA             | -1.49 | 0.04377 |
| 32358230 | <i>HCG23</i>   | -1.35 | 0.044   |
| 32754918 | NA             | -1.72 | 0.04472 |
| 32991503 | NA             | -1.14 | 0.04592 |
| 32022897 | <i>TNXB</i>    | -1.76 | 0.04652 |
| 30065849 | NA             | 0.26  | 0.04689 |
| 29816120 | NA             | -0.70 | 0.04731 |
| 30270078 | <i>HCG18</i>   | 1.56  | 0.04798 |
| 30565189 | NA             | 0.15  | 0.04834 |
| 31320162 | NA             | -0.19 | 0.04913 |
| 31369237 | <i>MICA</i>    | -0.65 | 0.04915 |
| 30244710 | NA             | 1.61  | 0.04993 |

Table S5: Summary of the top findings from Ingenuity Pathway Analysis of genes harboring significant DMLs

| Genes with Hypermethylated CpGs                                                        |                     |                 | Genes with Hypomethylated CpGs                                                                       |                     |                 |
|----------------------------------------------------------------------------------------|---------------------|-----------------|------------------------------------------------------------------------------------------------------|---------------------|-----------------|
| Name                                                                                   | P-value             | Focus Molecules | Name                                                                                                 | P-value             | Focus Molecules |
| <b>Canonical Pathways</b>                                                              |                     |                 | <b>Canonical Pathways</b>                                                                            |                     |                 |
| Crosstalk between Dendritic Cells and Natural Killer Cells                             | 2.27E-02            | 1               | Antigen Presentation Pathway                                                                         | 1.94E-06            | 3               |
| <b>Molecular and Cellular Functions</b>                                                |                     |                 | <b>Molecular and Cellular Functions</b>                                                              |                     |                 |
| Cell Death & Survival                                                                  | 1.38E-02 - 5.14E-04 | 1               | Allograft Rejection Pathway                                                                          | 4.57E-04            | 2               |
| Post Translational Modification                                                        | 1.80E-03 - 1.80E-03 | 1               | OX40 Signaling Pathway                                                                               | 6.22E-04            | 2               |
| Cellular Compromise                                                                    | 1.38E-02 - 3.08E-03 | 1               | Cdc42 Signaling                                                                                      | 3.24E-03            | 2               |
| Cell Morphology                                                                        | 1.76E-02 - 1.76E-02 | 1               | Th1 Pathway                                                                                          | 3.29E-03            | 2               |
| <b>Physiological System Development and Function</b>                                   |                     |                 | <b>Molecular and Cellular Functions</b>                                                              |                     |                 |
| Hematological System Development and Function                                          | 4.16E-02 - 1.45E-04 | 4               | Cellular Development                                                                                 | 3.81E-02 - 3.95E-04 | 6               |
| Hematopoiesis                                                                          | 1.24E-02 - 1.45E-04 | 3               | Cellular Growth and Proliferation                                                                    | 3.81E-02 - 3.95E-04 | 6               |
| Lymphoid Tissue Structure and Development                                              | 1.24E-02 - 1.45E-04 | 4               | Cell Death & Survival                                                                                | 3.55E-02 - 1.34E-03 | 3               |
| Organismal Functions                                                                   | 2.46E-02 - 3.02E-04 | 2               | Cellular Assembly and Organization                                                                   | 3.10E-02 - 1.34E-03 | 5               |
| Organismal Survival                                                                    | 2.98E-02 - 2.98E-03 | 3               | <b>Physiological System Development and Function</b>                                                 |                     |                 |
| <b>Diseases and Disorders</b>                                                          |                     |                 | <b>Diseases and Disorders</b>                                                                        |                     |                 |
| Insulin-dependent Diabetes Mellitus                                                    | 5.44E-10            | 5               | Hematological System Development and Function                                                        | 3.95E-04            | 3               |
| Rheumatoid Arthritis                                                                   | 2.50E-02            | 2               | Lymphoid Tissue Structure and Development                                                            | 3.95E-04            | 3               |
| <b>Upstream Regulator</b>                                                              |                     |                 | <b>Diseases and Disorders</b>                                                                        |                     |                 |
| IFN alpha receptor                                                                     | 4.98E-04            |                 | Insulin-dependent Diabetes Mellitus                                                                  | 7.44E-17            | 10              |
| ADAM10                                                                                 | 1.25E-03            |                 | Rheumatoid Arthritis                                                                                 | 1.81E-09            | 9               |
| ATR                                                                                    | 2.74E-03            |                 | Systemic Lupus Erythematosus                                                                         | 4.33E-04            | 3               |
| <b>Networks</b>                                                                        |                     |                 | <b>Upstream Regulator</b>                                                                            |                     |                 |
| Cancer, Cell Cycle, Cell Morphology                                                    |                     | 3               | EBI23                                                                                                | 2.81E-07            |                 |
| Cancer, Gastrointestinal Disease, Neurological Disease                                 |                     | 3               | IL27                                                                                                 | 5.78E-06            |                 |
| Cell Death and Survival, Cell-to-Cell Signaling and Interaction, Inflammatory Response |                     | 2               | NF-κ B Complex                                                                                       | 4.37E-04            |                 |
|                                                                                        |                     |                 | IFN alpha receptor                                                                                   | 1.30E-03            |                 |
|                                                                                        |                     |                 | <b>Networks</b>                                                                                      |                     |                 |
|                                                                                        |                     |                 | Connective Tissue Disorders, Inflammatory Disease, Organismal Injury and Abnormalities               |                     | 22              |
|                                                                                        |                     |                 | Embryonic Development, Organismal Development, Skeletal and Muscular System Development and Function |                     | 3               |

Table S6: Validation of DMLs – Table showing the CpG IDs, and their positions mapped from chromosome 6 of a publically-available EWAS dataset (GSE42861) as per the CpG coordinates of the 74 DMLs identified in our study. Average  $\beta$ -value represents the methylation difference between RA patients and healthy controls (HC). *P*-values were calculated by Mann-Whitney U test. NA= Not applicable as gene annotation was not available at that position.

| <b>Gene</b>      | <b>CpG ID</b> | <b>Position</b> | <b>Ave <math>\beta</math>-Value (RA - Control)</b> | <b><i>P</i>-Value</b> |
|------------------|---------------|-----------------|----------------------------------------------------|-----------------------|
| <i>DDX39B</i>    | cg00124488    | 31509762        | -0.004                                             | 0.11149               |
| <i>HLA-F-AS1</i> | cg00089464    | 29717223        | -0.1083                                            | 0.00176               |
| <i>TNXB</i>      | cg00122779    | 32033006        | -0.2787                                            | 0.00029               |
| <i>TAPI</i>      | cg00240875    | 32817673        | -0.0136                                            | 0.00000               |
| <i>PPP1R10</i>   | cg00320625    | 30584596        | 0.04793                                            | 0.08855               |
| <i>HLA-F-AS1</i> | cg00346247    | 29716850        | 0.14259                                            | 0.00000               |
| NA               | cg00402668    | 32768079        | -0.0019                                            | 0.00010               |
| NA               | cg00402668    | 32768079        | -0.0019                                            | 0.00010               |
| <i>ZFP57</i>     | cg00539542    | 29644543        | 0.00012                                            | 0.02863               |
| <i>TNXB</i>      | cg00592944    | 32032715        | -0.0118                                            | 0.00000               |
| <i>C6orf10</i>   | cg00738945    | 32340353        | -0.016                                             | 0.00000               |
| <i>DDX39B</i>    | cg00916439    | 31509423        | 0.27988                                            | 0.00000               |
| <i>PPP1R10</i>   | cg00918762    | 30585116        | 0.1066                                             | 0.00001               |
| <i>IER3</i>      | cg00985729    | 30712558        | -0.1108                                            | 0.00020               |
| <i>PPP1R10</i>   | cg00990221    | 30585121        | 0.15223                                            | 0.00000               |
| <i>TNXB</i>      | cg01054725    | 32023141        | -0.0085                                            | 0.00003               |
| <i>BRD2</i>      | cg01105943    | 32940865        | 0.10641                                            | 0.00123               |
| <i>DDX39B</i>    | cg01138972    | 31509890        | 0.13909                                            | 0.00000               |
| <i>TRIM40</i>    | cg01190484    | 30104593        | 0.08011                                            | 0.00056               |
| <i>TAPI</i>      | cg01255458    | 32817846        | -0.006                                             | 0.00002               |
| NA               | cg01388630    | 29817024        | -0.0018                                            | 0.33812               |
| NA               | cg01423251    | 32765321        | -0.0771                                            | 0.00000               |
| NA               | cg01423251    | 32765321        | -0.0771                                            | 0.00000               |
| NA               | cg01423251    | 32765321        | -0.0771                                            | 0.00000               |
| NA               | cg01423251    | 32765321        | -0.0771                                            | 0.00000               |
| <i>TRIM40</i>    | cg01506341    | 30104708        | -0.0427                                            | 0.41418               |
| <i>HCG18</i>     | cg01598009    | 30286161        | -0.0437                                            | 0.33499               |
| <i>BRD2</i>      | cg01641778    | 32935591        | 0.19181                                            | 0.00000               |

|                  |            |          |         |         |
|------------------|------------|----------|---------|---------|
| <i>IER3</i>      | cg01665212 | 30712373 | 0.32294 | 0.00000 |
| <i>BRD2</i>      | cg01845355 | 32940873 | 0.34379 | 0.00000 |
| <i>PPP1R10</i>   | cg01852131 | 30585154 | 0.09124 | 0.00001 |
| <i>DDX39B</i>    | cg02000145 | 31509401 | 0.50973 | 0.00000 |
| <i>HLA-DPA1</i>  | cg02286081 | 33043841 | 0.07305 | 0.00957 |
| <i>TNXB</i>      | cg02402501 | 32032279 | 0.00114 | 0.00345 |
| <i>BRD2</i>      | cg02448295 | 32941126 | 0.09352 | 0.10574 |
| <i>TNXB</i>      | cg02600478 | 32023332 | 0.02496 | 0.00000 |
| <i>C6orf10</i>   | cg02808240 | 32304142 | -0.2886 | 0.00007 |
| <i>PPP1R10</i>   | cg02809877 | 30584284 | 0.20548 | 0.00000 |
| <i>MUC21</i>     | cg02827154 | 30952059 | -0.0134 | 0.00001 |
| <i>HLA-DOB</i>   | cg02954194 | 32781384 | 0.00039 | 0.88979 |
| <i>BRD2</i>      | cg02985708 | 32940920 | 0.10842 | 0.00006 |
| <i>HLA-DOB</i>   | cg03083146 | 32781234 | -0.0209 | 0.00000 |
| <i>HLA-F-AS1</i> | cg03150111 | 29718048 | -0.0023 | 0.05701 |
| <i>TRIM40</i>    | cg03251349 | 30104916 | -0.0053 | 0.18691 |
| <i>HLA-DOB</i>   | cg03530983 | 32781170 | -0.0214 | 0.00000 |
| <i>HLA-DOB</i>   | cg03530983 | 32781170 | -0.0214 | 0.00000 |
| <i>BRD2</i>      | cg03532223 | 32935857 | 0.15659 | 0.00000 |
| <i>NA</i>        | cg03639929 | 32765402 | -0.385  | 0.00163 |
| <i>NA</i>        | cg03639929 | 32765402 | -0.385  | 0.00163 |
| <i>NA</i>        | cg03639929 | 32765402 | -0.385  | 0.00163 |
| <i>NA</i>        | cg03639929 | 32765402 | -0.385  | 0.00163 |
| <i>STK19</i>     | cg03661299 | 31947216 | -0.0025 | 0.00318 |
| <i>PPP1R10</i>   | cg03697115 | 30585027 | 0.084   | 0.00070 |
| <i>BRD2</i>      | cg03758774 | 32936477 | 0.2447  | 0.00016 |
| <i>TAP1</i>      | cg03807983 | 32817662 | -0.0142 | 0.00014 |
| <i>NA</i>        | cg03819713 | 32764987 | 0.0991  | 0.00003 |
| <i>NA</i>        | cg03819713 | 32764987 | 0.0991  | 0.00003 |
| <i>NA</i>        | cg03819713 | 32764987 | 0.0991  | 0.00003 |
| <i>NA</i>        | cg03819713 | 32764987 | 0.0991  | 0.00003 |
| <i>NA</i>        | cg03999934 | 30325790 | -0.0753 | 0.23640 |
| <i>NA</i>        | cg03999934 | 30325790 | -0.0753 | 0.23640 |
| <i>IER3</i>      | cg04191142 | 30712865 | -0.0031 | 0.73277 |
| <i>DDX39B</i>    | cg04211275 | 31508916 | 0.08257 | 0.00000 |
| <i>MUC21</i>     | cg04230397 | 30951917 | 0.04178 | 0.04473 |
| <i>MICA</i>      | cg04405704 | 31369118 | 0.07064 | 0.25212 |
| <i>MICA</i>      | cg04405704 | 31369118 | 0.07064 | 0.25212 |
| <i>DDX39B</i>    | cg04431990 | 31509495 | 0.15132 | 0.00000 |



|                  |            |          |         |         |
|------------------|------------|----------|---------|---------|
| <i>PPP1R10</i>   | cg04513728 | 30584979 | 0.23957 | 0.00000 |
| <i>BRD2</i>      | cg04607679 | 32935802 | 0.19329 | 0.00000 |
| <i>TNXB</i>      | cg04754615 | 32032722 | -0.0138 | 0.00185 |
| <i>DDX39B</i>    | cg04755523 | 31508664 | 0.02363 | 0.00172 |
| <i>BRD2</i>      | cg04798369 | 32935521 | 0.1232  | 0.00146 |
| <i>AIF1</i>      | cg04812347 | 31584222 | -0.2541 | 0.04411 |
| <i>HLA-L</i>     | cg04884612 | 30231638 | 7.1E-05 | 0.00015 |
| <i>IER3</i>      | cg04940526 | 30712924 | -0.0177 | 0.07146 |
| <i>IER3</i>      | cg04956913 | 30712435 | 0.09968 | 0.02491 |
| <i>NA</i>        | cg05050652 | 29816165 | 0.1931  | 0.00000 |
| <i>BRD2</i>      | cg05111146 | 32935024 | -0.0106 | 0.56684 |
| <i>HLA-F-AS1</i> | cg05542661 | 29717068 | 0.06995 | 0.00001 |
| <i>TNXB</i>      | cg05598103 | 32022929 | -0.001  | 0.29411 |
| <i>TRIM40</i>    | cg05681072 | 30104981 | 0.01875 | 0.78767 |
| <i>TRIM40</i>    | cg05978864 | 30105174 | 0.00117 | 0.24305 |
| <i>HLA-F-AS1</i> | cg06097213 | 29717651 | -0.2188 | 0.00973 |
| <i>MUC21</i>     | cg06183469 | 30951084 | 0.01608 | 0.00010 |
| <i>TRIM40</i>    | cg06195293 | 30104884 | -0.0064 | 0.63324 |
| <i>TRIM40</i>    | cg06365108 | 30104625 | -0.0243 | 0.93893 |
| <i>TNXB</i>      | cg06418131 | 32023649 | 0.00824 | 0.16291 |
| <i>HLA-F-AS1</i> | cg06486622 | 29718119 | 0.06096 | 0.00067 |
| <i>NA</i>        | cg06855286 | 31010596 | 0.06992 | 0.00341 |
| <i>NA</i>        | cg07056079 | 32765313 | -0.1332 | 0.00107 |
| <i>NA</i>        | cg07056079 | 32765313 | -0.1332 | 0.00107 |
| <i>NA</i>        | cg07056079 | 32765313 | -0.1332 | 0.00107 |
| <i>NA</i>        | cg07056079 | 32765313 | -0.1332 | 0.00107 |
| <i>BRD2</i>      | cg07148032 | 32935353 | 0.06728 | 0.00000 |
| <i>NA</i>        | cg07180523 | 30325714 | -0.0386 | 0.65190 |
| <i>NA</i>        | cg07180523 | 30325714 | -0.0386 | 0.65190 |
| <i>BRD2</i>      | cg07275218 | 32942714 | 0.09882 | 0.42693 |
| <i>TRIM40</i>    | cg07405796 | 30104551 | -0.0484 | 0.14370 |
| <i>TNXB</i>      | cg07502333 | 32032852 | -0.004  | 0.00003 |
| <i>MUC21</i>     | cg07538160 | 30951393 | -0.0197 | 0.00349 |
| <i>NA</i>        | cg07653289 | 30325733 | -0.0099 | 0.11983 |
| <i>NA</i>        | cg07653289 | 30325733 | -0.0099 | 0.11983 |
| <i>HLA-L</i>     | cg07720160 | 30232813 | 0.01035 | 0.30348 |
| <i>BRD2</i>      | cg07820696 | 32935842 | 0.20453 | 0.00000 |
| <i>BRD2</i>      | cg07837102 | 32940878 | 0.05188 | 0.04885 |
| <i>TNXB</i>      | cg07910408 | 32023249 | -0.0084 | 0.00004 |

|                |            |          |         |         |
|----------------|------------|----------|---------|---------|
| NA             | cg07937542 | 32765150 | 0.0598  | 0.00014 |
| NA             | cg07937542 | 32765150 | 0.0598  | 0.00014 |
| NA             | cg07937542 | 32765150 | 0.0598  | 0.00014 |
| NA             | cg07937542 | 32765150 | 0.0598  | 0.00014 |
| BRD2           | cg07954885 | 32935262 | 0.05899 | 0.32430 |
| OR2H2          | cg07976328 | 29556415 | 0.03627 | 0.45247 |
| TRIM40         | cg08116408 | 30112776 | -0.0132 | 0.88996 |
| BRD2           | cg08361185 | 32936068 | 0.17543 | 0.00000 |
| HLA-DPA1       | cg08405587 | 33043137 | 0.00291 | 0.00156 |
| DDX39B         | cg08463024 | 31508166 | 0.08096 | 0.95733 |
| BRD2           | cg08491668 | 32935235 | 0.08351 | 0.04382 |
| NA             | cg08548095 | 30325756 | 0.11272 | 0.00003 |
| NA             | cg08548095 | 30325756 | 0.11272 | 0.00003 |
| <i>C6orf10</i> | cg08563982 | 32306373 | -0.0157 | 0.00000 |
| PPP1R10        | cg08917831 | 30585023 | 0.05494 | 0.00299 |
| BRD2           | cg08948338 | 32936101 | 0.06545 | 0.00106 |
| IER3           | cg09016822 | 30712396 | 0.08251 | 0.00016 |
| TNXB           | cg09102573 | 32023251 | -0.0093 | 0.00002 |
| TNXB           | cg09107710 | 32033306 | -0.0383 | 0.00009 |
| IER3           | cg09127400 | 30712330 | 0.19457 | 0.00009 |
| IER3           | cg09131512 | 30713441 | -0.0149 | 0.00008 |
| TRIM40         | cg09196959 | 30104440 | 0.07617 | 0.00213 |
| HLA-L          | cg09262446 | 30231689 | -0.0277 | 0.00000 |
| TRIM40         | cg09423413 | 30104754 | -0.0215 | 0.31860 |
| DDX39B         | cg09427493 | 31508934 | 0.27785 | 0.00000 |
| BRD2           | cg09547081 | 32941066 | 0.21998 | 0.00005 |
| HLA-F-AS1      | cg09567915 | 29717259 | -0.1893 | 0.10828 |
| NA             | cg09625158 | 32764900 | 0.11996 | 0.00000 |
| NA             | cg09625158 | 32764900 | 0.11996 | 0.00000 |
| NA             | cg09625158 | 32764900 | 0.11996 | 0.00000 |
| NA             | cg09625158 | 32764900 | 0.11996 | 0.00000 |
| <i>C6orf10</i> | cg09646336 | 32339511 | -0.0146 | 0.00000 |
| PPP1R10        | cg09702881 | 30584746 | 0.19313 | 0.00000 |
| NA             | cg10012475 | 32764944 | 0.3137  | 0.00000 |
| NA             | cg10012475 | 32764944 | 0.3137  | 0.00000 |
| NA             | cg10012475 | 32764944 | 0.3137  | 0.00000 |
| NA             | cg10012475 | 32764944 | 0.3137  | 0.00000 |
| IER3           | cg10060574 | 30712337 | 0.05257 | 0.07413 |
| NA             | cg10141717 | 30099251 | -0.0058 | 0.13967 |

|                  |            |          |         |         |
|------------------|------------|----------|---------|---------|
| <i>ZFP57</i>     | cg10174063 | 29645037 | 0.10924 | 0.00001 |
| <i>BRD2</i>      | cg10211788 | 32936072 | 0.06182 | 0.00007 |
| <i>NA</i>        | cg10310917 | 29815787 | 0.02405 | 0.90483 |
| <i>TRIM40</i>    | cg10443019 | 30112422 | 0.00803 | 0.55277 |
| <i>HLA-L</i>     | cg10700459 | 30231674 | 0.0822  | 0.00000 |
| <i>TNXB</i>      | cg10750010 | 32023526 | 0.04355 | 0.11862 |
| <i>TRIM40</i>    | cg10848828 | 30104294 | 0.01947 | 0.05691 |
| <i>TNXB</i>      | cg11032077 | 32032727 | -0.0121 | 0.00570 |
| <i>MUC21</i>     | cg11062798 | 30950665 | 0.01    | 0.05969 |
| <i>HLA-F-AS1</i> | cg11091004 | 29716803 | 0.10708 | 0.00002 |
| <i>C6orf10</i>   | cg11196533 | 32303625 | -0.0179 | 0.00000 |
| <i>TNXB</i>      | cg11223361 | 32023102 | 0.05746 | 0.00024 |
| <i>HLA-DOB</i>   | cg11239749 | 32781306 | 0.00712 | 0.01169 |
| <i>DDX39B</i>    | cg11305058 | 31509623 | 0.09475 | 0.00000 |
| <i>BRD2</i>      | cg11439393 | 32942062 | 0.13778 | 0.00248 |
| <i>C6orf10</i>   | cg11478766 | 32305989 | 0.03047 | 0.90369 |
| <i>DDX39B</i>    | cg11489251 | 31508297 | 0.04372 | 0.33728 |
| <i>HLA-F-AS1</i> | cg11497864 | 29717268 | -0.2059 | 0.00000 |
| <i>DDX39B</i>    | cg11671290 | 31509249 | -0.014  | 0.51436 |
| <i>TNXB</i>      | cg11815438 | 32023282 | 0.002   | 0.00090 |
| <i>TRIM40</i>    | cg11963400 | 30112769 | -0.0262 | 0.46726 |
| <i>NA</i>        | cg11989485 | 29815869 | 0.17405 | 0.00000 |
| <i>IER3</i>      | cg12023692 | 30712919 | -0.0101 | 0.04688 |
| <i>HLA-F-AS1</i> | cg12035144 | 29718093 | 0.08755 | 0.04051 |
| <i>STK19</i>     | cg12149319 | 31947212 | 0.01352 | 0.06159 |
| <i>DDX39B</i>    | cg12244756 | 31509636 | 0.16684 | 0.00000 |
| <i>HLA-F-AS1</i> | cg12296326 | 29717113 | 0.05736 | 0.00124 |
| <i>IER3</i>      | cg12325285 | 30712499 | 0.17998 | 0.00000 |
| <i>HLA-DPA1</i>  | cg12365667 | 33043976 | 0.17007 | 0.00000 |
| <i>NA</i>        | cg12385981 | 29821319 | -0.007  | 0.09871 |
| <i>NA</i>        | cg12445115 | 32952758 | -0.0467 | 0.37968 |
| <i>ZFP57</i>     | cg12463578 | 29644756 | 0.05254 | 0.00004 |
| <i>PPP1R10</i>   | cg12503292 | 30584720 | 0.18015 | 0.00000 |
| <i>TRIM40</i>    | cg12612406 | 30103458 | 0.01707 | 0.03644 |
| <i>TRIM40</i>    | cg12758147 | 30103696 | 0.01272 | 0.95821 |
| <i>HCG18</i>     | cg12798859 | 30285979 | 0.02515 | 0.03680 |
| <i>HLA-DPA1</i>  | cg12865025 | 33042550 | -0.0085 | 0.03701 |
| <i>HLA-DPA1</i>  | cg12899649 | 33043762 | 0.12439 | 0.00000 |
| <i>HLA-DPA1</i>  | cg12939283 | 33044012 | 0.11814 | 0.00000 |

|                  |            |          |         |         |
|------------------|------------|----------|---------|---------|
| <i>TRIM40</i>    | cg13044052 | 30103699 | 0.03268 | 0.01969 |
| <i>PPP1R10</i>   | cg13083904 | 30584886 | 0.09527 | 0.00000 |
| <i>BRD2</i>      | cg13096242 | 32941033 | 0.48146 | 0.00000 |
| <i>TNXB</i>      | cg13154622 | 32032709 | 0.03262 | 0.18273 |
| <i>BRD2</i>      | cg13224077 | 32936078 | 0.01247 | 0.36883 |
| <i>MUC21</i>     | cg13464738 | 30950779 | 0.03527 | 0.84257 |
| <i>IER3</i>      | cg13630962 | 30712680 | -0.0521 | 0.16777 |
| <i>HLA-F-AS1</i> | cg13819127 | 29717368 | 0.00836 | 0.30332 |
| <i>IER3</i>      | cg13885965 | 30712409 | 0.12616 | 0.03574 |
| NA               | cg13962212 | 30325907 | -0.1297 | 0.09252 |
| NA               | cg13962212 | 30325907 | -0.1297 | 0.09252 |
| <i>TNXB</i>      | cg14011611 | 32023382 | -0.0009 | 0.08629 |
| <i>HLA-F-AS1</i> | cg14067066 | 29717475 | -0.0315 | 0.70530 |
| <i>DDX39B</i>    | cg14130272 | 31509426 | 0.08386 | 0.00180 |
| <i>DDX39B</i>    | cg14159895 | 31509604 | 0.07579 | 0.00110 |
| <i>DDX39B</i>    | cg14182431 | 31509577 | 0.02912 | 0.05489 |
| <i>TNXB</i>      | cg14200543 | 32023246 | 0.01213 | 0.86356 |
| <i>BRD2</i>      | cg14306264 | 32935788 | 0.15277 | 0.00000 |
| <i>HLA-DPA1</i>  | cg14356799 | 33044345 | 0.02228 | 0.00084 |
| <i>BRD2</i>      | cg14361162 | 32935737 | 0.37924 | 0.00000 |
| NA               | cg14372587 | 32764864 | 0.08004 | 0.00001 |
| NA               | cg14372587 | 32764864 | 0.08004 | 0.00001 |
| NA               | cg14372587 | 32764864 | 0.08004 | 0.00001 |
| NA               | cg14372587 | 32764864 | 0.08004 | 0.00001 |
| <i>DDX39B</i>    | cg14373189 | 31509243 | 0.28457 | 0.00000 |
| <i>MUC21</i>     | cg14531049 | 30952175 | -0.0241 | 0.00000 |
| <i>HLA-F-AS1</i> | cg14629287 | 29716767 | 0.05829 | 0.03155 |
| <i>C6orf10</i>   | cg14704780 | 32305106 | -0.249  | 0.00000 |
| <i>TRIM40</i>    | cg14708905 | 30113074 | 0.04993 | 0.42043 |
| NA               | cg15027295 | 31153947 | 0.02192 | 0.00010 |
| <i>MUC21</i>     | cg15167736 | 30950713 | 0.00044 | 0.00008 |
| NA               | cg15185936 | 32764950 | 0.15089 | 0.00000 |
| NA               | cg15185936 | 32764950 | 0.15089 | 0.00000 |
| NA               | cg15185936 | 32764950 | 0.15089 | 0.00000 |
| NA               | cg15185936 | 32764950 | 0.15089 | 0.00000 |
| <i>BRD2</i>      | cg15266497 | 32936346 | 0.02264 | 0.43825 |
| NA               | cg15279832 | 32952242 | -0.0294 | 0.07830 |
| <i>TNXB</i>      | cg15281225 | 32032889 | 0.01566 | 0.00997 |
| <i>BRD2</i>      | cg15315493 | 32941388 | 0.11142 | 0.00000 |

|                  |            |          |         |         |
|------------------|------------|----------|---------|---------|
| <i>MUC21</i>     | cg15442792 | 30951376 | -0.002  | 0.48967 |
| <i>PPP1R10</i>   | cg15677497 | 30585191 | 0.04159 | 0.00004 |
| <i>HCG18</i>     | cg15695731 | 30285905 | -0.0465 | 0.00000 |
| <i>C6orf10</i>   | cg15744124 | 32306088 | -0.2138 | 0.00000 |
| <i>NA</i>        | cg15835500 | 32952707 | 0.2311  | 0.00000 |
| <i>HLA-L</i>     | cg16055914 | 30231886 | 0.01171 | 0.42333 |
| <i>NA</i>        | cg16284213 | 32952568 | 0.08369 | 0.00000 |
| <i>NA</i>        | cg16398511 | 31010700 | 0.01906 | 0.02823 |
| <i>BRD2</i>      | cg16416715 | 32942358 | 0.09207 | 0.22691 |
| <i>BRD2</i>      | cg16416806 | 32935897 | 0.22506 | 0.00000 |
| <i>NA</i>        | cg16516959 | 32765109 | 0.42854 | 0.00000 |
| <i>NA</i>        | cg16516959 | 32765109 | 0.42854 | 0.00000 |
| <i>NA</i>        | cg16516959 | 32765109 | 0.42854 | 0.00000 |
| <i>NA</i>        | cg16516959 | 32765109 | 0.42854 | 0.00000 |
| <i>C6orf10</i>   | cg16564946 | 32304275 | -0.1329 | 0.00000 |
| <i>TNXB</i>      | cg16651678 | 32023408 | -0.0063 | 0.00006 |
| <i>BRD2</i>      | cg16801540 | 32936415 | 0.13368 | 0.00000 |
| <i>BRD2</i>      | cg16944926 | 32940976 | 0.08092 | 0.00036 |
| <i>DDX39B</i>    | cg16981259 | 31509433 | 0.26884 | 0.00000 |
| <i>IER3</i>      | cg17067528 | 30712517 | -0.147  | 0.00128 |
| <i>HLA-F-AS1</i> | cg17105013 | 29716711 | 0.09753 | 0.00984 |
| <i>IER3</i>      | cg17266690 | 30713243 | -0.0233 | 0.00002 |
| <i>BRD2</i>      | cg17451586 | 32942808 | 0.13173 | 0.01601 |
| <i>BRD2</i>      | cg17451945 | 32936362 | 0.04058 | 0.01359 |
| <i>BRD2</i>      | cg17478371 | 32941824 | 0.12965 | 0.00000 |
| <i>DDX39B</i>    | cg17489752 | 31509945 | 0.21268 | 0.00000 |
| <i>HLA-F-AS1</i> | cg17514431 | 29717656 | -0.054  | 0.04971 |
| <i>BRD2</i>      | cg17674495 | 32935917 | 0.11951 | 0.00000 |
| <i>HLA-F-AS1</i> | cg17748329 | 29717057 | 0.24252 | 0.00000 |
| <i>TNXB</i>      | cg17806757 | 32070387 | -0.0241 | 0.00000 |
| <i>HLA-F-AS1</i> | cg17825311 | 29717187 | 0.06866 | 0.00000 |
| <i>BRD2</i>      | cg17840326 | 32935852 | 0.14972 | 0.00000 |
| <i>HLA-DOB</i>   | cg18073883 | 32780860 | 0.00454 | 0.33740 |
| <i>HLA-DOB</i>   | cg18073883 | 32780860 | 0.00454 | 0.33740 |
| <i>HLA-DOB</i>   | cg18073883 | 32780860 | 0.00454 | 0.33740 |
| <i>DDX39B</i>    | cg18091165 | 31509351 | 0.09659 | 0.02334 |
| <i>BRD2</i>      | cg18098714 | 32935403 | 0.03497 | 0.03058 |
| <i>AIF1</i>      | cg18113826 | 31583941 | -0.3159 | 0.42514 |
| <i>IER3</i>      | cg18361467 | 30713294 | -0.0132 | 0.37773 |

|                  |            |          |         |         |
|------------------|------------|----------|---------|---------|
| <i>PPP1R10</i>   | cg18561902 | 30584760 | 0.23349 | 0.00000 |
| NA               | cg18595780 | 31010742 | 0.03629 | 0.01855 |
| <i>BRD2</i>      | cg18782846 | 32941079 | 0.17182 | 0.00000 |
| <i>DDX39B</i>    | cg18821320 | 31509875 | 0.03015 | 0.03165 |
| <i>HLA-DPA1</i>  | cg18827221 | 33043093 | 0.02094 | 0.01894 |
| <i>TRIM40</i>    | cg18835549 | 30112581 | -0.0071 | 0.00090 |
| NA               | cg18890461 | 31010837 | 0.05407 | 0.03259 |
| <i>BRD2</i>      | cg18918417 | 32942205 | 0.26844 | 0.00000 |
| <i>MUC21</i>     | cg18921025 | 30952063 | 0.03188 | 0.00002 |
| NA               | cg19167507 | 32764866 | 0.04637 | 0.00349 |
| NA               | cg19167507 | 32764866 | 0.04637 | 0.00349 |
| NA               | cg19167507 | 32764866 | 0.04637 | 0.00349 |
| NA               | cg19167507 | 32764866 | 0.04637 | 0.00349 |
| <i>PPP1R10</i>   | cg19182468 | 30584270 | 0.00599 | 0.10707 |
| <i>DDX39B</i>    | cg19234301 | 31509894 | 0.12193 | 0.00002 |
| <i>HLA-F-AS1</i> | cg19352507 | 29717261 | -0.1777 | 0.00495 |
| <i>AIF1</i>      | cg19563932 | 31583915 | -0.305  | 0.03059 |
| NA               | cg19642505 | 30224156 | 0.00673 | 0.12669 |
| <i>HLA-F-AS1</i> | cg19766164 | 29716938 | 0.06518 | 0.00727 |
| <i>HLA-DPA1</i>  | cg19921353 | 33043574 | 0.06026 | 0.00003 |
| <i>C6orf10</i>   | cg19988162 | 32303790 | -0.0237 | 0.00000 |
| NA               | cg20067471 | 32765281 | 0.12819 | 0.00000 |
| NA               | cg20067471 | 32765281 | 0.12819 | 0.00000 |
| NA               | cg20067471 | 32765281 | 0.12819 | 0.00000 |
| NA               | cg20067471 | 32765281 | 0.12819 | 0.00000 |
| <i>IER3</i>      | cg20284982 | 30713245 | 0.03209 | 0.01599 |
| <i>BRD2</i>      | cg20471890 | 32936107 | 0.0326  | 0.11091 |
| <i>C6orf10</i>   | cg20636526 | 32305144 | -0.3057 | 0.00000 |
| <i>IER3</i>      | cg20650802 | 30712307 | 0.19123 | 0.00001 |
| NA               | cg20713893 | 32952783 | 0.11675 | 0.00000 |
| NA               | cg20751345 | 30066428 | -0.037  | 0.01212 |
| <i>MUC21</i>     | cg20759486 | 30951225 | 0.04385 | 0.01368 |
| <i>TNXB</i>      | cg20928974 | 32022642 | 0.06298 | 0.90030 |
| <i>TRIM40</i>    | cg20958486 | 30105197 | 0.01647 | 0.16244 |
| <i>MICA</i>      | cg21001008 | 31368502 | 0.12363 | 0.00008 |
| <i>MICA</i>      | cg21001008 | 31368502 | 0.12363 | 0.00008 |
| <i>DDX39B</i>    | cg21024122 | 31509146 | 0.40694 | 0.00000 |
| <i>HLA-DPA1</i>  | cg21151963 | 33043220 | 0.01577 | 0.00002 |
| <i>DDX39B</i>    | cg21179831 | 31508137 | 0.06975 | 0.01316 |

|                  |            |          |         |         |
|------------------|------------|----------|---------|---------|
| <i>TNXB</i>      | cg21189146 | 32069841 | -0.0127 | 0.00001 |
| <i>C6orf10</i>   | cg21195277 | 32339207 | -0.009  | 0.36092 |
| <i>PPP1R10</i>   | cg21424801 | 30584892 | 0.55883 | 0.00000 |
| <i>AIF1</i>      | cg21440587 | 31583457 | -0.2473 | 0.00142 |
| <i>TNXB</i>      | cg21624533 | 32022542 | 0.01599 | 0.13932 |
| <i>TNXB</i>      | cg21754201 | 32032816 | 0.01853 | 0.03735 |
| <i>HLA-DOB</i>   | cg22016094 | 32781260 | -0.009  | 0.00006 |
| NA               | cg22050330 | 32765022 | 0.09931 | 0.00000 |
| NA               | cg22050330 | 32765022 | 0.09931 | 0.00000 |
| NA               | cg22050330 | 32765022 | 0.09931 | 0.00000 |
| NA               | cg22050330 | 32765022 | 0.09931 | 0.00000 |
| <i>HLA-F-AS1</i> | cg22124493 | 29717031 | 0.08132 | 0.00039 |
| NA               | cg22366909 | 30565189 | 0.06364 | 0.05177 |
| <i>HLA-DPA1</i>  | cg22483030 | 33043848 | 0.10279 | 0.00003 |
| <i>TNXB</i>      | cg22501666 | 32070101 | -0.0358 | 0.00000 |
| NA               | cg22550059 | 32765007 | 0.27501 | 0.00000 |
| NA               | cg22550059 | 32765007 | 0.27501 | 0.00000 |
| NA               | cg22550059 | 32765007 | 0.27501 | 0.00000 |
| NA               | cg22550059 | 32765007 | 0.27501 | 0.00000 |
| <i>TRIM40</i>    | cg22692281 | 30104899 | 0.00091 | 0.24998 |
| NA               | cg22862357 | 32774788 | 0.14276 | 0.13445 |
| <i>C6orf10</i>   | cg22863148 | 32339553 | -0.0012 | 0.00000 |
| <i>HLA-L</i>     | cg23071690 | 30232014 | 0.00266 | 0.12859 |
| NA               | cg23090653 | 32765352 | -0.3364 | 0.00810 |
| NA               | cg23090653 | 32765352 | -0.3364 | 0.00810 |
| NA               | cg23090653 | 32765352 | -0.3364 | 0.00810 |
| NA               | cg23090653 | 32765352 | -0.3364 | 0.00810 |
| NA               | cg23163653 | 30565385 | 0.05955 | 0.36156 |
| NA               | cg23314071 | 32765117 | 0.46187 | 0.00000 |
| NA               | cg23314071 | 32765117 | 0.46187 | 0.00000 |
| NA               | cg23314071 | 32765117 | 0.46187 | 0.00000 |
| NA               | cg23314071 | 32765117 | 0.46187 | 0.00000 |
| <i>IER3</i>      | cg23338650 | 30712303 | 0.09521 | 0.00002 |
| <i>TRIM40</i>    | cg23481243 | 30112492 | -0.0019 | 0.03098 |
| <i>HLA-F-AS1</i> | cg23606396 | 29717916 | 0.04742 | 0.20670 |
| NA               | cg23663942 | 32778026 | 0.02207 | 0.63699 |
| NA               | cg23663942 | 32778026 | 0.02207 | 0.63699 |
| <i>TNXB</i>      | cg23711760 | 32032787 | 0.0302  | 0.06829 |
| <i>HLA-F-AS1</i> | cg23727007 | 29716795 | 0.18307 | 0.00000 |

|                  |            |          |         |         |
|------------------|------------|----------|---------|---------|
| <i>HLA-DPA1</i>  | cg23750365 | 33043071 | 0.005   | 0.00000 |
| <i>IER3</i>      | cg23756354 | 30713097 | -0.007  | 0.00322 |
| <i>IER3</i>      | cg24053148 | 30713318 | 0.04164 | 0.00002 |
| <i>DDX39B</i>    | cg24124954 | 31508105 | 0.11268 | 0.03185 |
| <i>BRD2</i>      | cg24182083 | 32941162 | 0.05645 | 0.00004 |
| <i>HLA-F-AS1</i> | cg24217789 | 29717384 | -0.0628 | 0.25718 |
| <i>BRD2</i>      | cg24275356 | 32942541 | 0.10919 | 0.28970 |
| <i>DDX39B</i>    | cg24294399 | 31508923 | 0.15338 | 0.00000 |
| <i>MUC21</i>     | cg24311704 | 30951604 | 0.02682 | 0.36421 |
| <i>PPP1R10</i>   | cg24330922 | 30584244 | 0.24082 | 0.00000 |
| <i>DDX39B</i>    | cg24332685 | 31508125 | 0.03522 | 0.50735 |
| <i>TNXB</i>      | cg24336152 | 32070784 | -0.0187 | 0.00000 |
| <i>IER3</i>      | cg24363824 | 30713025 | -0.0176 | 0.00817 |
| <i>HLA-F-AS1</i> | cg24438313 | 29717009 | 0.26525 | 0.00000 |
| <i>BRD2</i>      | cg24489398 | 32936051 | -0.0312 | 0.32538 |
| <i>DDX39B</i>    | cg24631162 | 31508318 | 0.04768 | 0.89372 |
| <i>C6orf10</i>   | cg24640182 | 32305067 | -0.079  | 0.00002 |
| <i>PPP1R10</i>   | cg24657127 | 30585058 | 0.01064 | 0.78556 |
| <i>HLA-F-AS1</i> | cg24710480 | 29717135 | 0.16982 | 0.00000 |
| NA               | cg24955682 | 29815804 | -0.0108 | 0.14658 |
| <i>C6orf10</i>   | cg25145195 | 32340954 | -0.0291 | 0.00001 |
| <i>BRD2</i>      | cg25158622 | 32942428 | 0.11674 | 0.41471 |
| <i>TNXB</i>      | cg25270367 | 32022898 | -0.1647 | 0.00964 |
| <i>TNXB</i>      | cg25355006 | 32032689 | 0.05456 | 0.58794 |
| <i>AIF1</i>      | cg25403205 | 31584214 | -0.2248 | 0.07673 |
| NA               | cg25435686 | 32952826 | 0.18081 | 0.00000 |
| <i>HLA-F-AS1</i> | cg25456960 | 29717018 | 0.03322 | 0.18048 |
| <i>C6orf10</i>   | cg25457674 | 32303820 | -0.0196 | 0.00000 |
| NA               | cg25585873 | 32764880 | 0.08556 | 0.00087 |
| NA               | cg25585873 | 32764880 | 0.08556 | 0.00087 |
| NA               | cg25585873 | 32764880 | 0.08556 | 0.00087 |
| NA               | cg25585873 | 32764880 | 0.08556 | 0.00087 |
| NA               | cg25701100 | 29815902 | 0.08829 | 0.00000 |
| <i>DDX39B</i>    | cg25984249 | 31509765 | 0.0911  | 0.00000 |
| <i>ZFP57</i>     | cg26021304 | 29645117 | -0.233  | 0.00111 |
| <i>BRD2</i>      | cg26059973 | 32935912 | 0.06674 | 0.00003 |
| <i>TRIM40</i>    | cg26091747 | 30113696 | 0.01205 | 0.55866 |
| <i>C6orf10</i>   | cg26263563 | 32306039 | 0.0095  | 0.00073 |
| <i>BRD2</i>      | cg26264318 | 32942399 | 0.13068 | 0.01883 |



|                 |            |          |         |         |
|-----------------|------------|----------|---------|---------|
| <i>NA</i>       | cg26273120 | 32764965 | 0.09537 | 0.00007 |
| <i>NA</i>       | cg26273120 | 32764965 | 0.09537 | 0.00007 |
| <i>NA</i>       | cg26273120 | 32764965 | 0.09537 | 0.00007 |
| <i>NA</i>       | cg26273120 | 32764965 | 0.09537 | 0.00007 |
| <i>HLA-DPA1</i> | cg26350754 | 33043867 | 0.04226 | 0.10851 |
| <i>IER3</i>     | cg26376168 | 30712438 | 0.08286 | 0.08986 |
| <i>BRD2</i>     | cg26406907 | 32941108 | 0.35189 | 0.00000 |
| <i>DDX39B</i>   | cg26696685 | 31509196 | 0.04442 | 0.00063 |
| <i>PPP1R10</i>  | cg26813794 | 30584951 | 0.30298 | 0.00001 |
| <i>BRD2</i>     | cg26953232 | 32942494 | 0.11601 | 0.47891 |
| <i>TNXB</i>     | cg26977256 | 32022469 | 0.00735 | 0.00005 |
| <i>BRD2</i>     | cg27395200 | 32942710 | 0.09387 | 0.38955 |
